# Supplementary material for: Evaluation of Liquid Cloud Albedo Susceptibility in E3SM Using Coupled Eastern North Atlantic Surface and Satellite Retrievals
Source: Copernicus journal article supplement (doi:10.5194/egusphere-2023-998), 2023-05-23
Supplement: Supplementary file 1 [file egusphere-2023-998-supplement.pdf]

# Supplement to “Evaluation of Liquid Cloud Albedo Susceptibility in E3SM Using Coupled Eastern North Atlantic Surface and Satellite Retrievals”

Adam C. Varble<sup>1</sup>, Po-Lun Ma<sup>1</sup>, Matt W. Christensen<sup>1</sup>, Johannes Mülmenstädt<sup>1</sup>, Shuaiqi Tang<sup>1</sup>, and Jerome Fast<sup>1</sup>

<sup>1</sup>Atmospheric and Global Change Division, Pacific Northwest National Laboratory, Richland, Washington, 99354, USA

Correspondence to: Adam C. Varble (adam.varble@pnnl.gov)

## Supplemental Figures

| Dataset                      | % Time ><br>0.001 mm h <sup>-1</sup> | % Time ><br>0.01 mm h <sup>-1</sup> | % Time ><br>0.1 mm h <sup>-1</sup> | % Time ><br>1 mm h <sup>-1</sup> | Average (mm h <sup>-1</sup> ) |
|------------------------------|--------------------------------------|-------------------------------------|------------------------------------|----------------------------------|-------------------------------|
| 60-min Parsivel2 Disdrometer | 15                                   | 9.2                                 | 3.4                                | 0.1                              | 0.014                         |
| 60-min Optical Rain Gauge    | 18                                   | 10                                  | 2.9                                | 0                                | 0.010                         |
| E3SM                         | 62                                   | 49                                  | 8.5                                | 0                                | 0.033                         |
| E3SM (only stratiform)       | 21                                   | 7.1                                 | 1.0                                | 0                                | 0.005                         |

**Table S1:** Probabilities of surface hourly rain rate exceeding several threshold values and average surface hourly rain rates across all times including those with < 0.001 mm h<sup>-1</sup> set to 0.

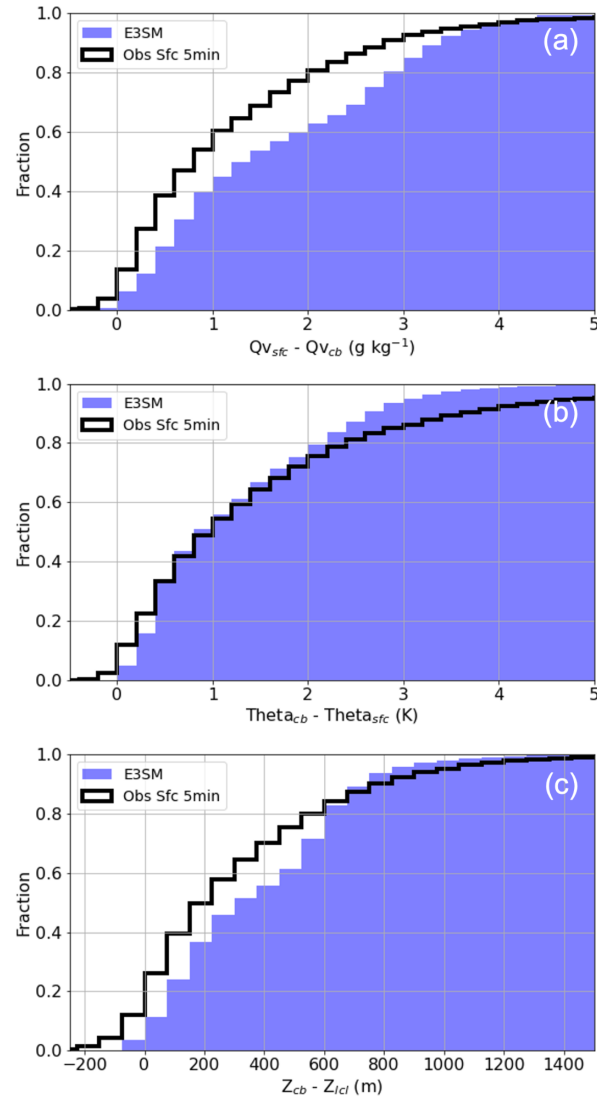

**Figure S1:** CDFs of boundary layer coupling indices including (a) water vapor mixing ratio difference between the surface and cloud base, (b) potential temperature difference between the surface and cloud base, and (c) the difference between cloud base height and the surface-based lifted condensation level. All are derived from interpolated sounding observations and E3SM output. The greater the value, the more decoupled the cloud is from the surface.

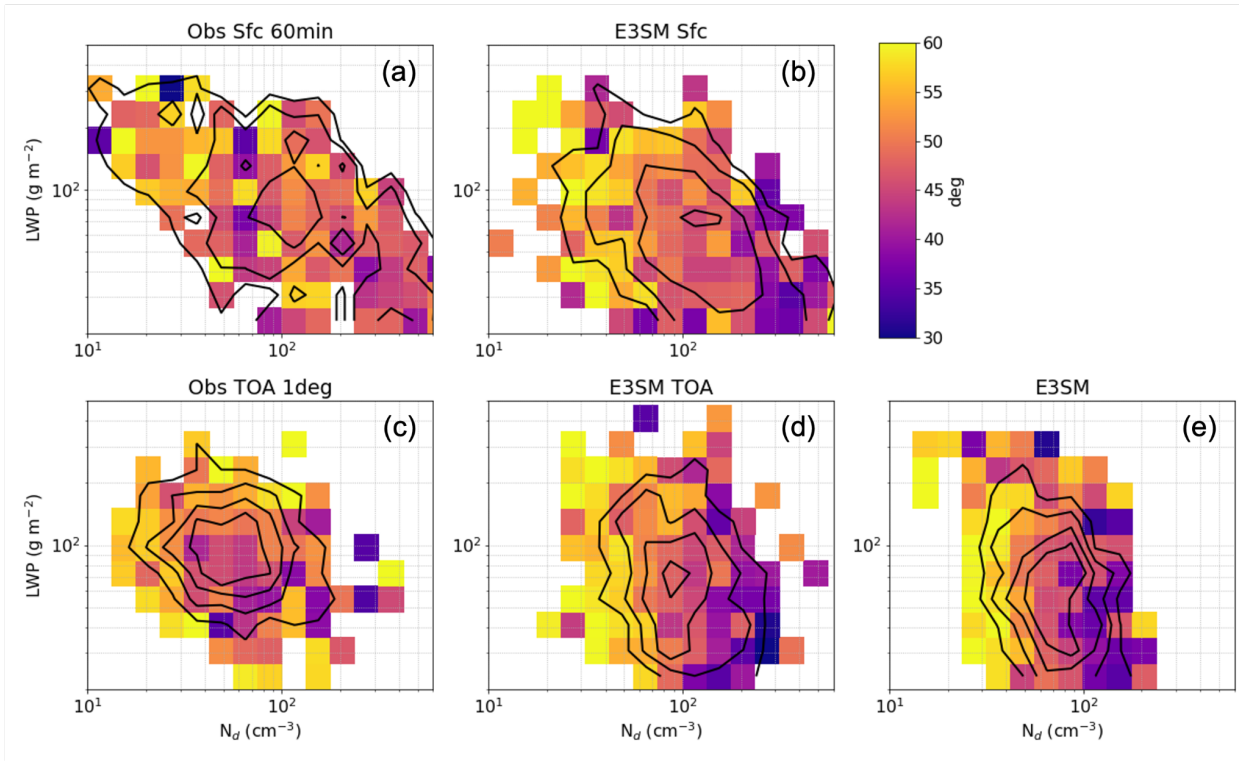

**Figure S2:** Median SZA as a function of  $N_d$  and LWP for (a) Obs Sfc 60min, (b) E3SM Sfc, (c) Obs TOA 1deg, (d) E3SM TOA, and (e) E3SM. Black contours indicate sample size thresholds of 0.4, 0.8, 1.6, and 3.2%, respectively.

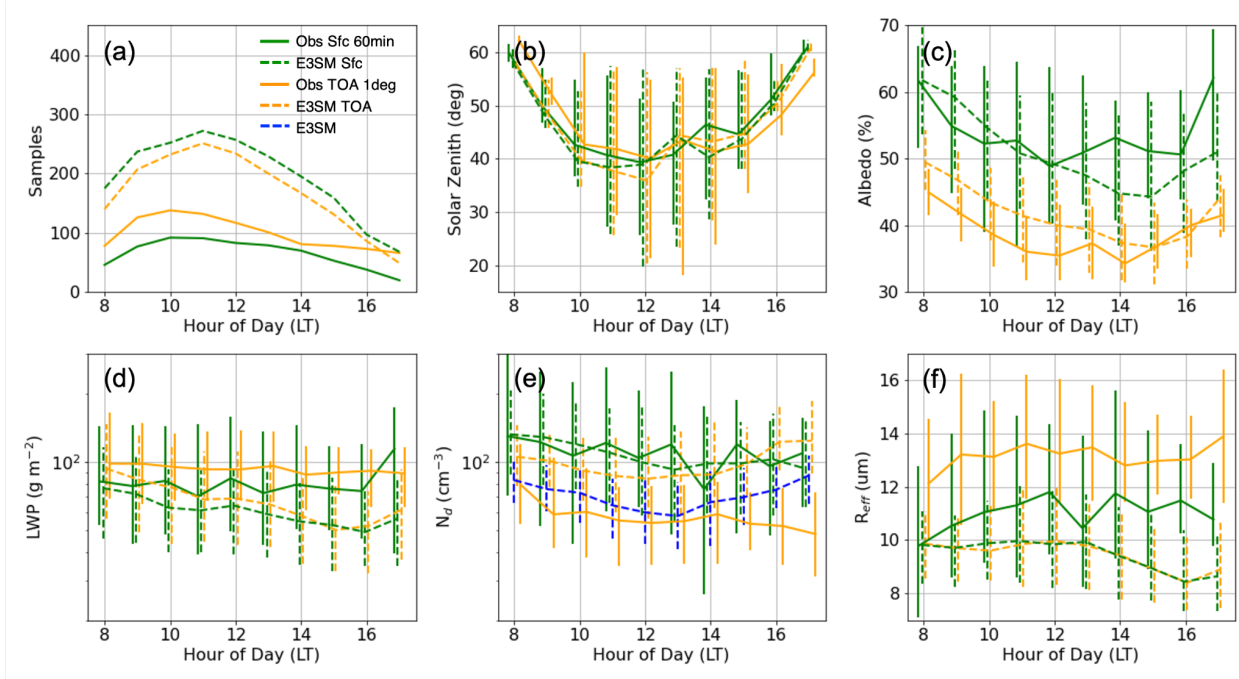

20 **Figure S3:** Diurnal cycles of (a) samples and interquartile ranges connected by medians for (b)  $SZA < 65^\circ$ , (c) TOA or cloud effective albedo, (d) cloud LWP, (e) layer-mean  $N_d$ , and (f)  $R_{eff}$ .

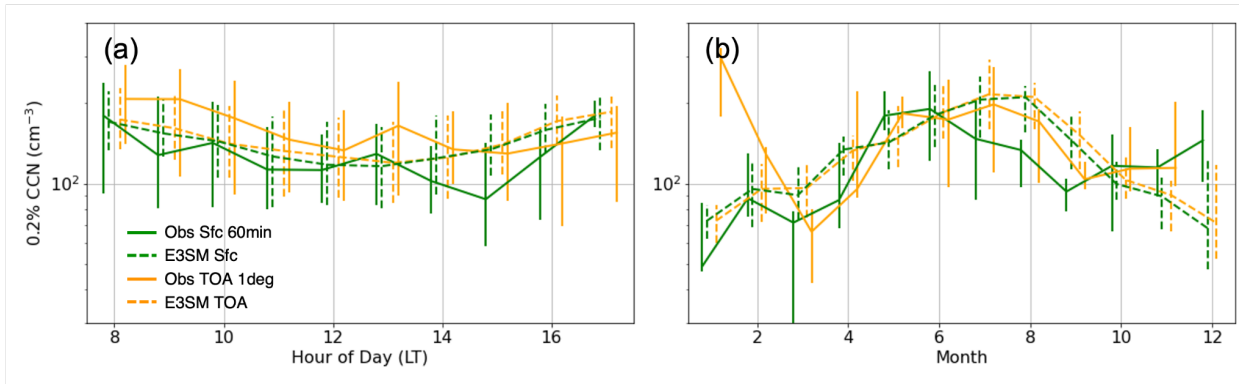

**Figure S4:** (a) Diurnal and (b) seasonal cycles of 0.2% CCN concentration in observed and E3SM surface and TOA datasets for situations in which overcast, single layer liquid clouds are more likely to be coupled with the surface.

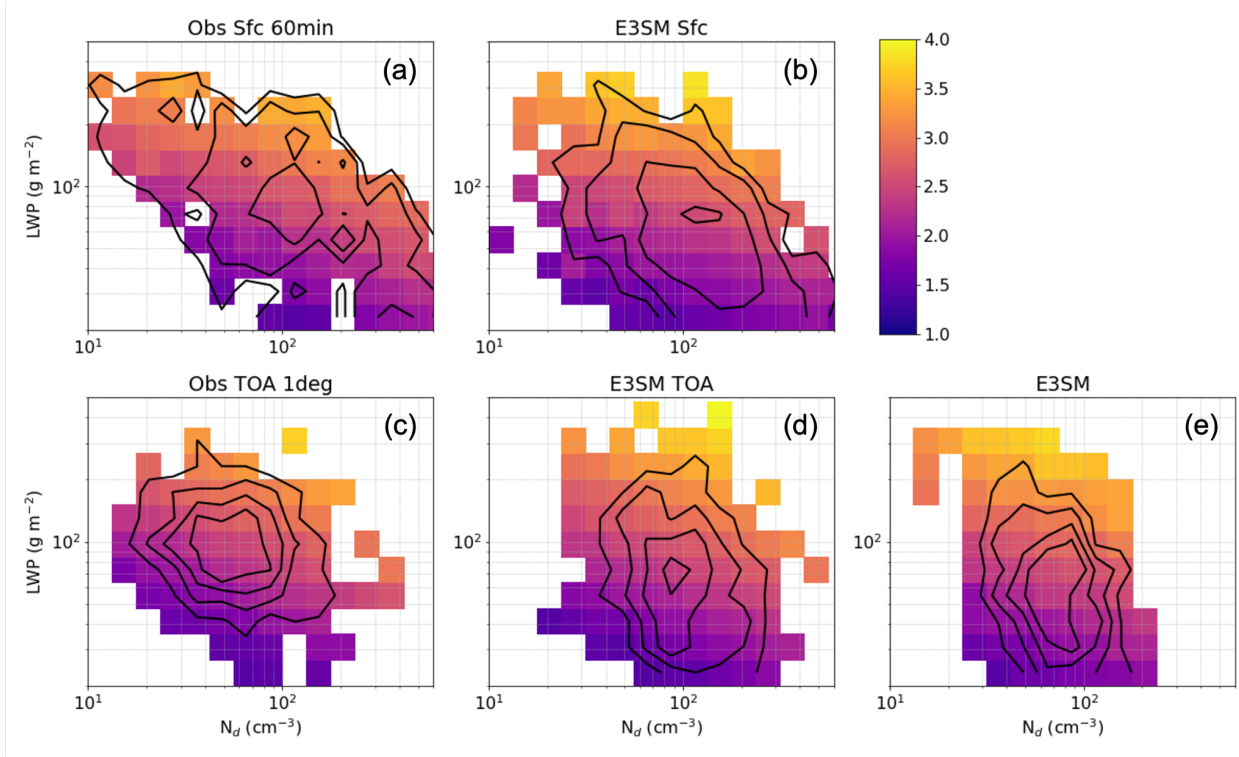

**Figure S5:** Median lnCOD as a function of  $N_d$  and LWP for (a) Obs Sfc 60min, (b) E3SM Sfc, (c) Obs TOA 1deg, (d) E3SM TOA, and (e) E3SM. Black contours indicate sample size thresholds of 0.4, 0.8, 1.6, and 3.2%, respectively.

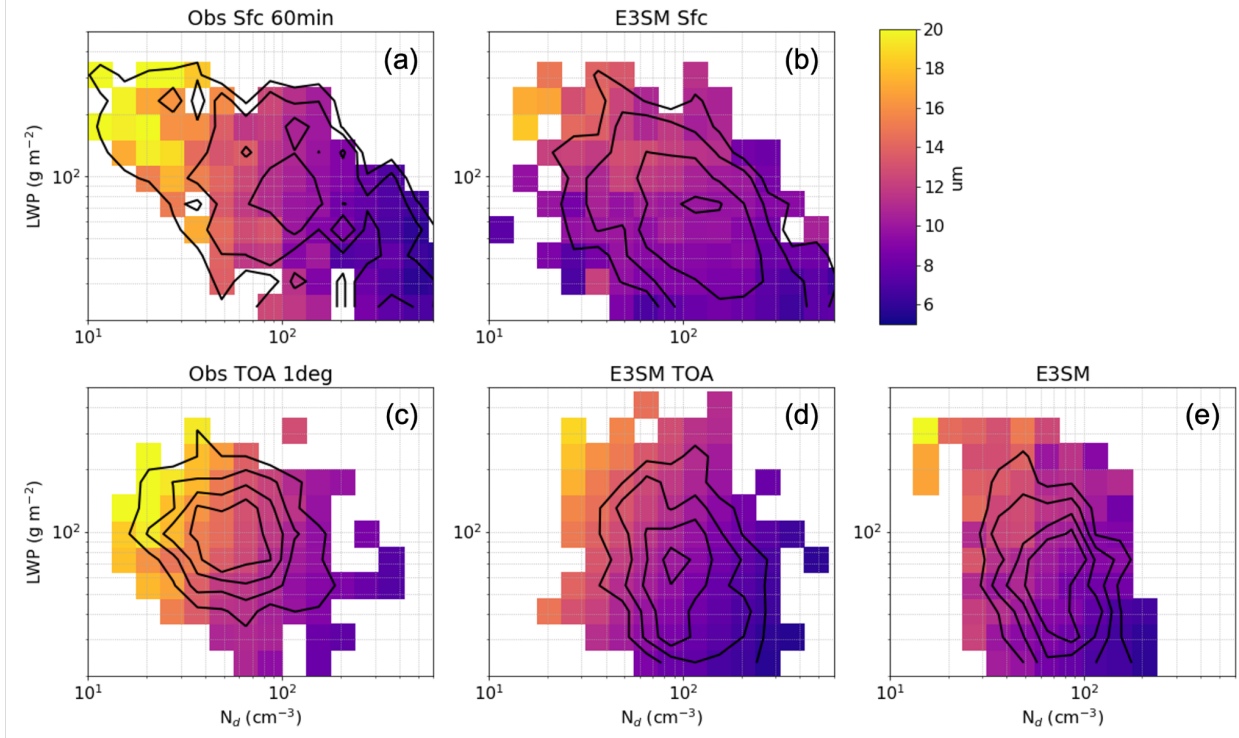

**Figure S6:** Median  $R_{\text{eff}}$  as a function of  $N_d$  and LWP for (a) Obs Sfc 60min, (b) E3SM Sfc, (c) Obs TOA 1deg, (d) E3SM TOA, and (e) E3SM.

30 Black contours indicate sample size thresholds of 0.4, 0.8, 1.6, and 3.2%, respectively.

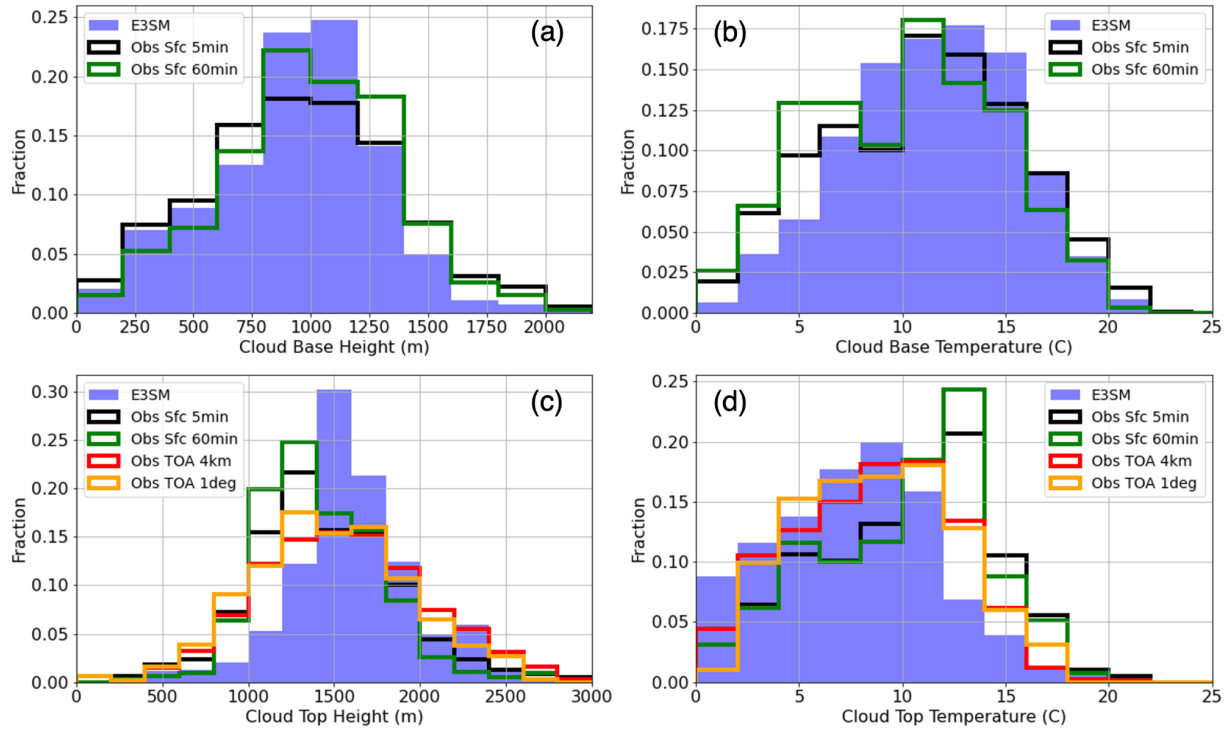

**Figure S7:** Cloud base (a) height and (b) temperature, along with cloud top (c) height and (d) temperature PDFs. TOA estimated cloud base values are not shown due to being poorly estimated.

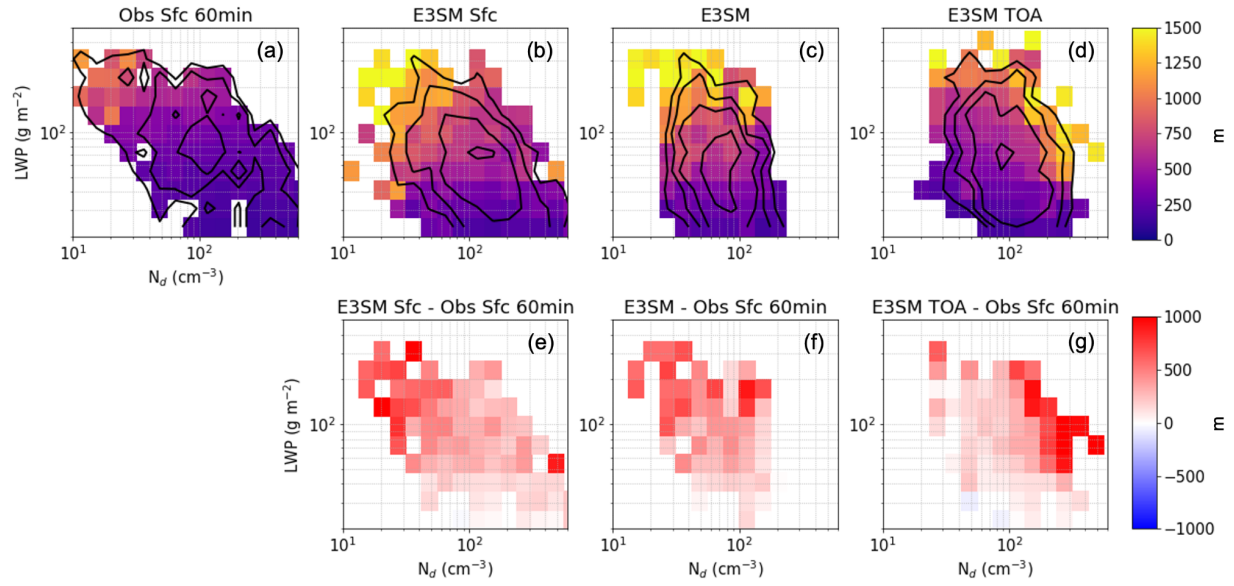

35 **Figure S8:** Median cloud depth in (a) Obs Sfc 60min, (b) E3SM Sfc, (c) E3SM, and (d) E3SM TOA. Absolute differences between the 3 E3SM datasets and observations are shown in (e-g). Black contours indicate sample size thresholds of 0.4, 0.8, 1.6, and 3.2%, respectively.

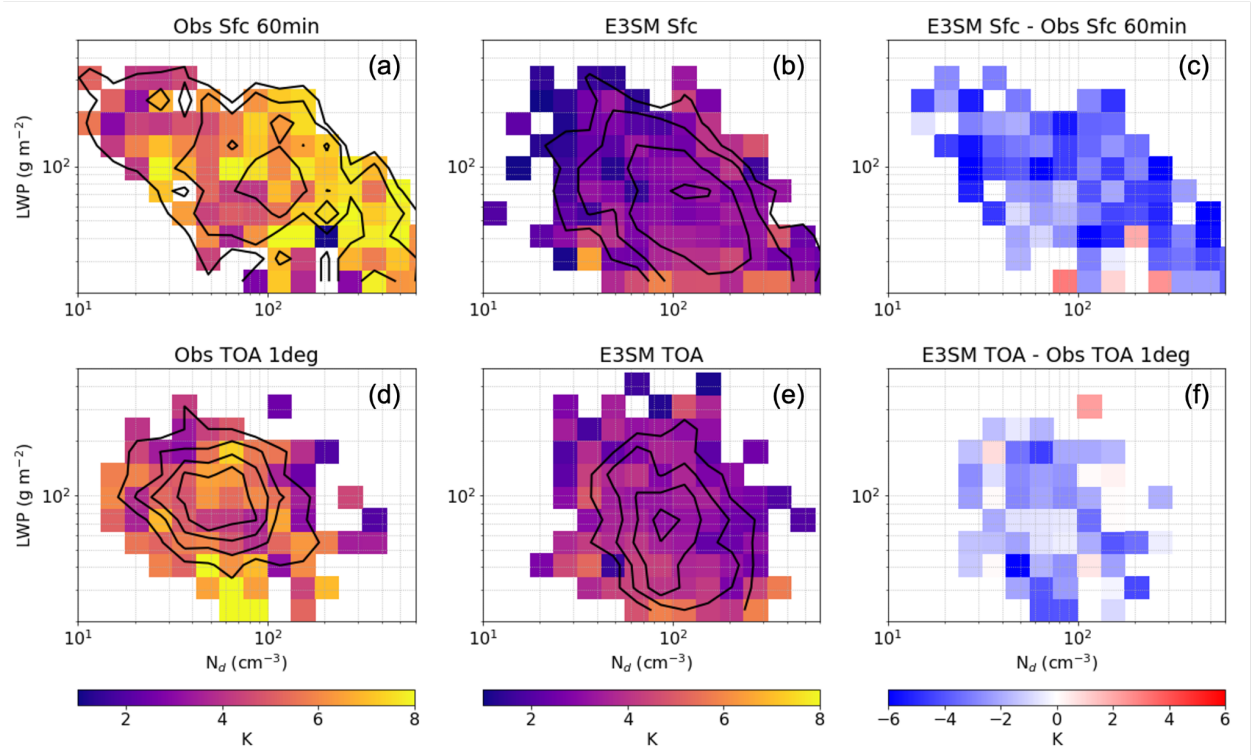

**Figure S9:** Median EIS as a function of LWP and  $N_d$  for (a) Obs Sfc 60min and (b) E3SM Sfc with their absolute difference shown in (c). Median EIS for Obs TOA 1deg, E3SM TOA, and their difference are shown in (d-f).

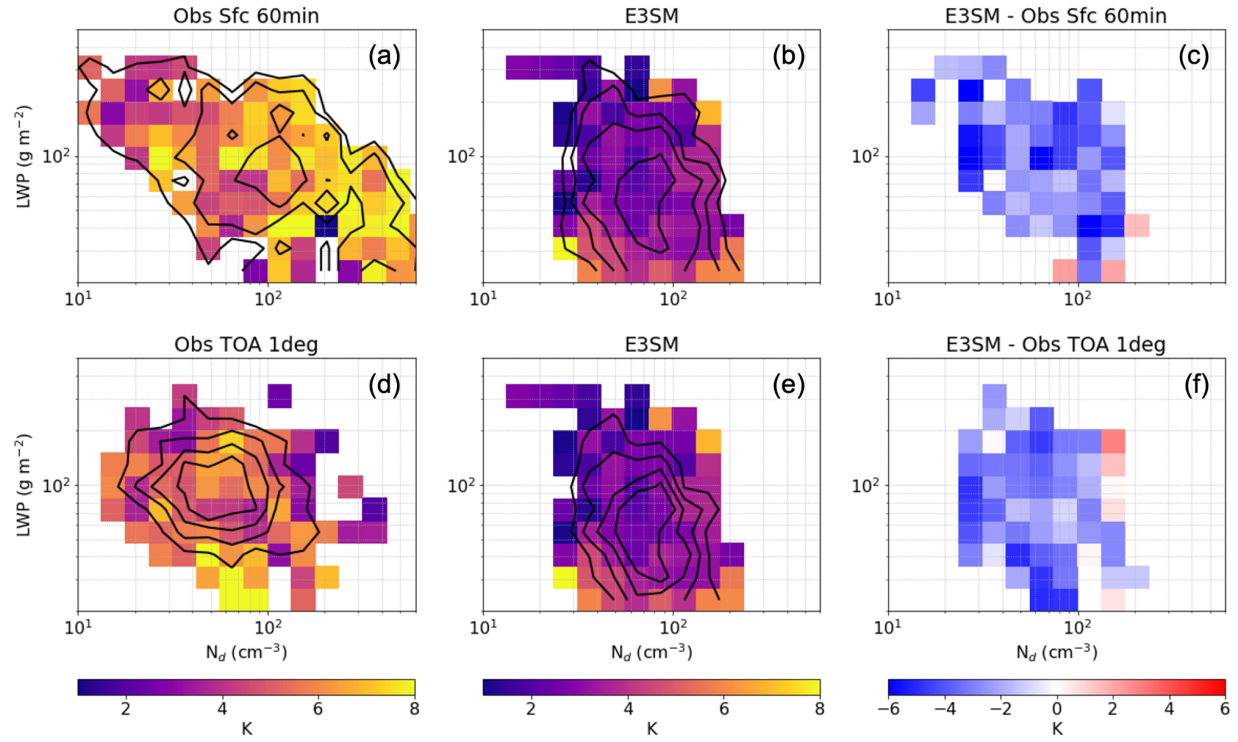

**Figure S10:** Median EIS as a function of LWP and  $N_d$  for (a) Obs Sfc 60min and (b) E3SM with their absolute difference shown in (c). Median EIS for Obs TOA 1deg, E3SM, and their difference are shown in (d-f).

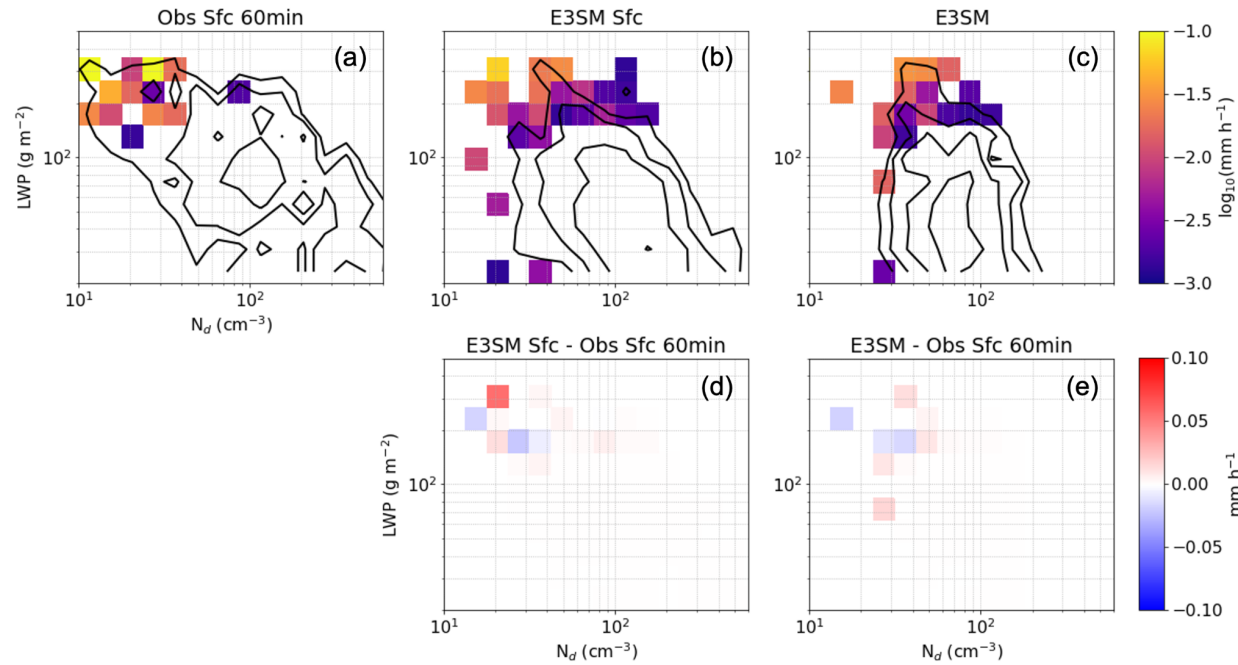

**Figure S11:** Median surface hourly rain rate as a function of LWP and  $N_d$  for (a) Obs Sfc 60min disdrometer retrievals, (b) E3SM Sfc, and (c) E3SM, but including only stratiform rates for E3SM and E3SM Sfc. (d) Absolute differences between E3SM Sfc stratiform and Obs Sfc 60min disdrometer rain rates. (e) Absolute differences between E3SM stratiform and Obs Sfc 60min disdrometer rain rates. Only rain rates exceeding  $0.001 \text{ mm h}^{-1}$  are included in statistics due to observational sensitivity limitations. Black contours indicate sample size thresholds of 0.4, 0.8, 1.6, and 3.2%, respectively.

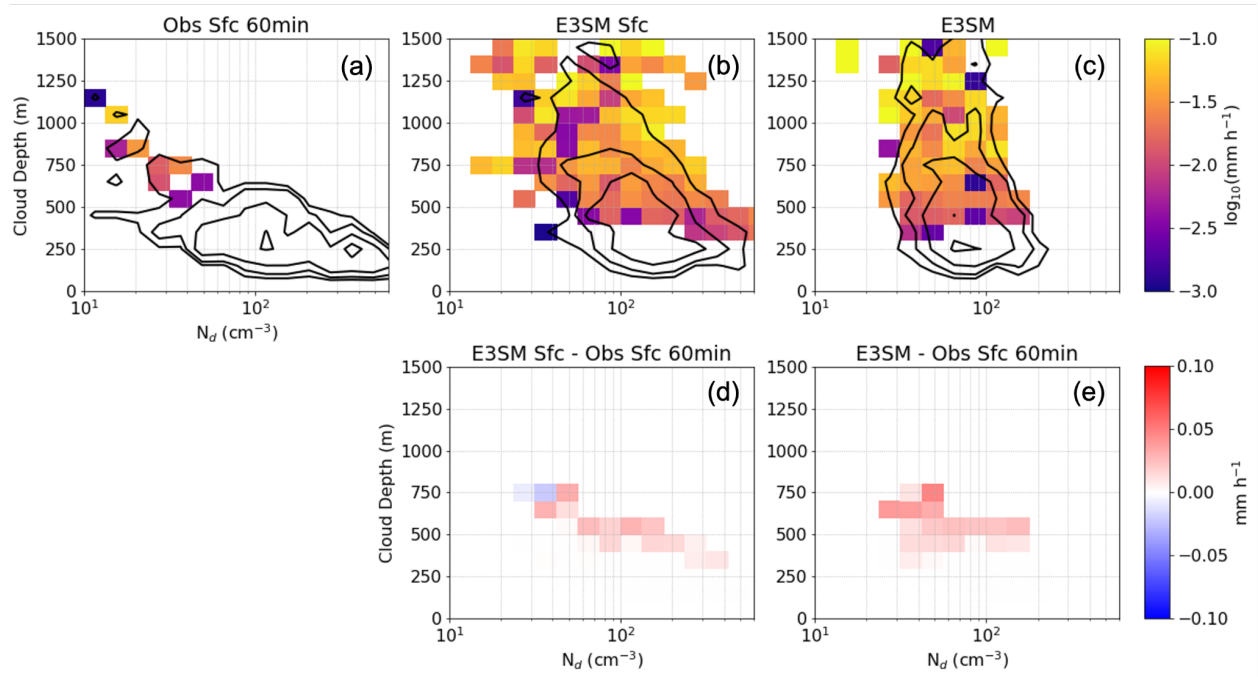

50 **Figure S12:** Median surface hourly rain rate as a function of cloud depth and  $N_d$  for (a) Obs Sfc 60min disdrometer retrievals, (b) E3SM Sfc, and (c) E3SM. (d) Absolute differences between E3SM Sfc and Obs Sfc 60min. (e) Absolute differences between E3SM and Obs Sfc 60min. Only rain rates exceeding  $0.001 \text{ mm h}^{-1}$  are included in statistics due to observational sensitivity limitations. Black contours indicate sample size thresholds of 0.4, 0.8, 1.6, and 3.2%, respectively.

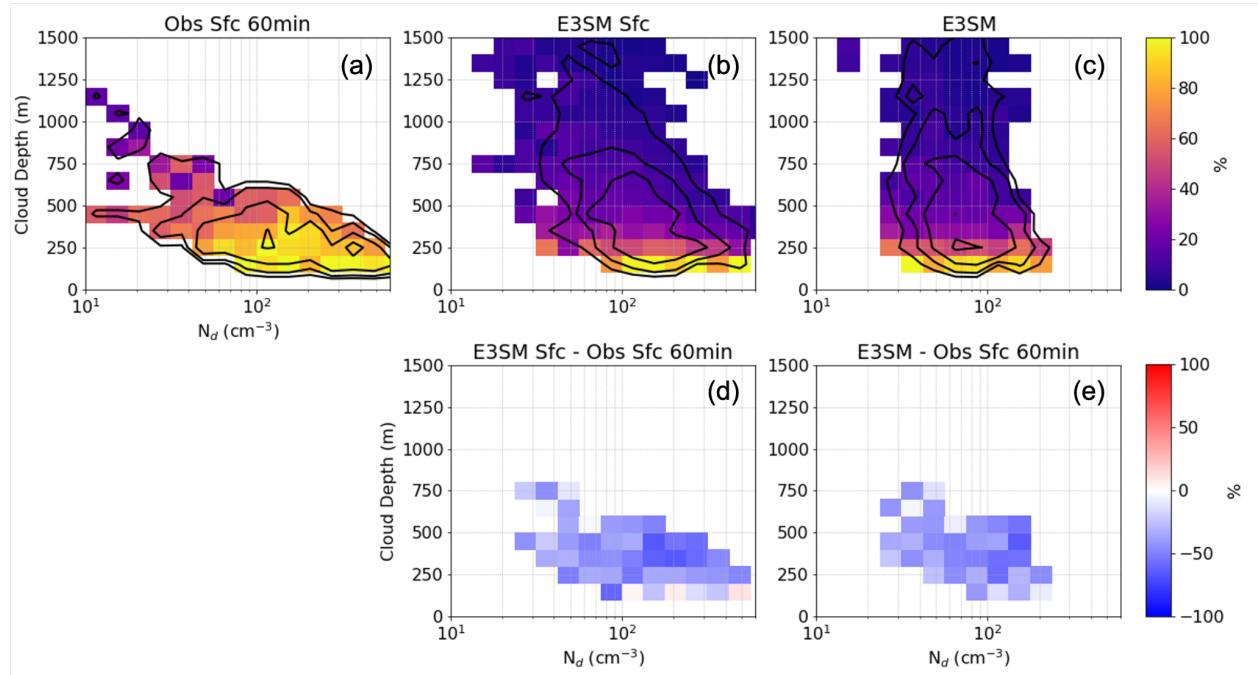

55 **Figure S13:** Median cloud adiabaticity as a function of cloud depth and  $N_d$  for (a) Obs Sfc 60min, (b) E3SM Sfc, and (c) E3SM. (d) Absolute differences between E3SM Sfc and Obs Sfc 60min. (e) Absolute differences between E3SM and Obs Sfc 60min. Black contours indicate sample size thresholds of 0.4, 0.8, 1.6, and 3.2%, respectively.
